# Supplementary material
Source: PubMed Central journal article supplement (PMC4687757)
Supplement: NIHMS704119-supplement-01.pdf [file NIHMS704119-supplement-01.pdf]

## SUPPLEMENTARY INFORMATION

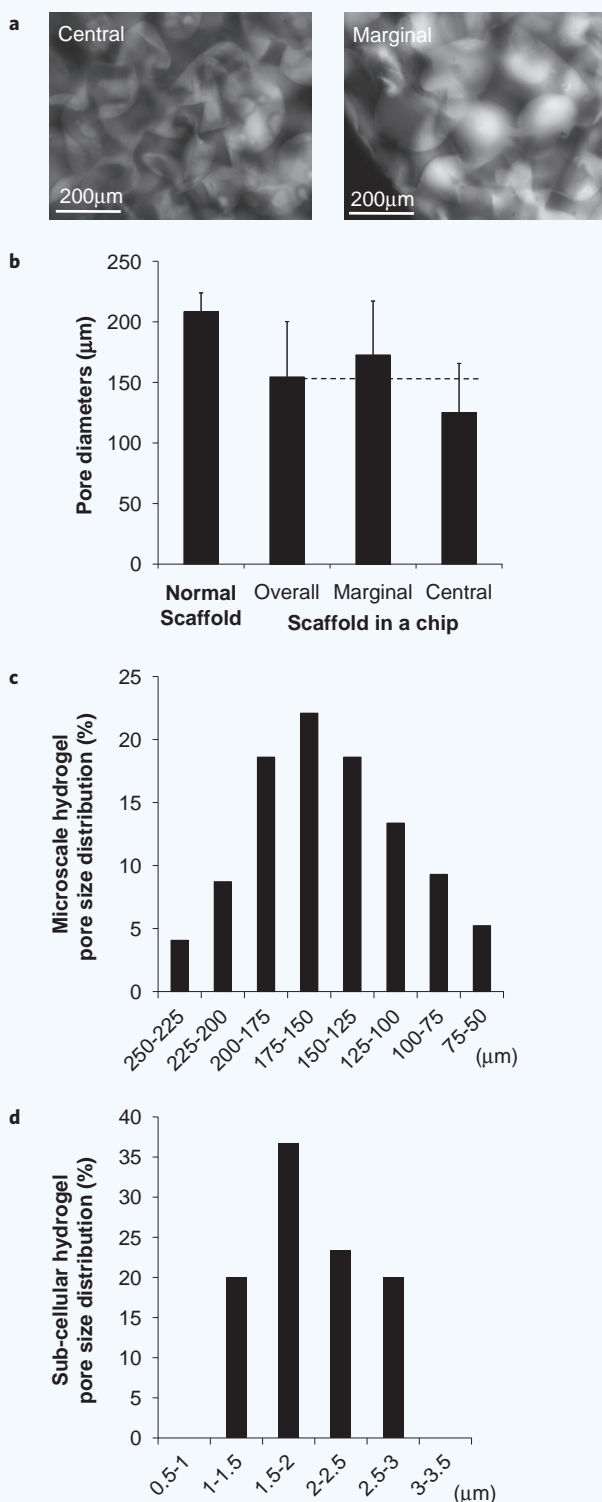

**Supplementary Figure 1** (a) Fluorescent microscope images of central and marginal regions of microfluidic hydrogel scaffolds after loading FITC-Dextran. (b) Comparison of pore size in different regions of microfluidic hydrogel scaffolds ( $n = 55$ ). (c) Histogram of microscale hydrogel pore size distribution of microfluidic scaffolds ( $n = 100$ ). (d) Histogram of sub-cellular hydrogel pore size distribution ( $n = 30$ ).

## Empty Chamber

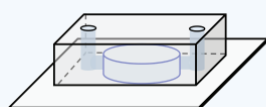

D=6mm, H=1mm  
Volume= 28.28mm<sup>3</sup>  
Surface area=28.28mm<sup>2</sup>

## Scaffold Chamber

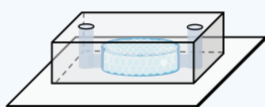

Assumptions  
- Each pore has spherical shape  
- Each pore has 12 channels

Pore D=0.154mm  
Channel D=0.03mm  
Each pore has 12 channels

## Estimated total surface area of a scaffold-chip

Chamber volume = Each pore volume x Total pore number

\* Pore volume=0.0019123mm<sup>3</sup>

\* Total pore number= 14,778

Available pore surface = Pore surface – Channel area x (12)

\* Pore surface= 0.0745mm<sup>2</sup>

\* Channel area= 0.00848mm<sup>2</sup>

\* Available pore surface= 0.06602mm<sup>2</sup>

Total available pore surface

= Available pore surface x Total pore number

= 975.64mm<sup>2</sup>

Total surface for cell adhesion

= Chamber surface + Scaffold surface

=1003.92mm<sup>2</sup>

\* Provide about 35 more surface area than an empty chamber

**Supplementary Figure 2** Assumptions and calculation of total surface area for cell adhesion in a microfluidic hydrogel scaffold in comparison with an empty chamber.

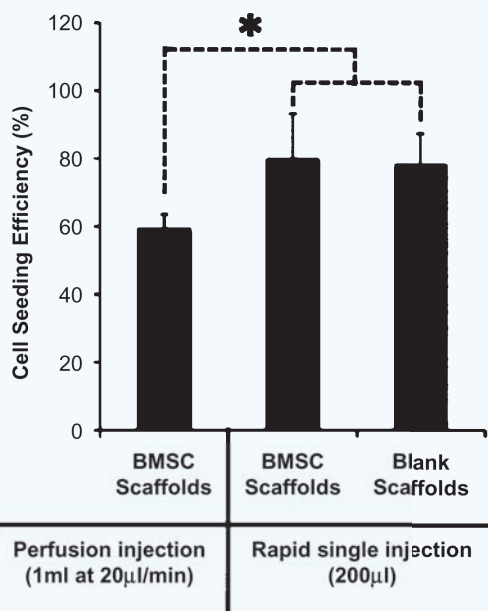

**Supplementary Figure 3** Comparison of cell seeding efficiency depending on seeding methods and pre-coated BMSCs ( $n = 5$ ,  $*p < 0.05$ ).

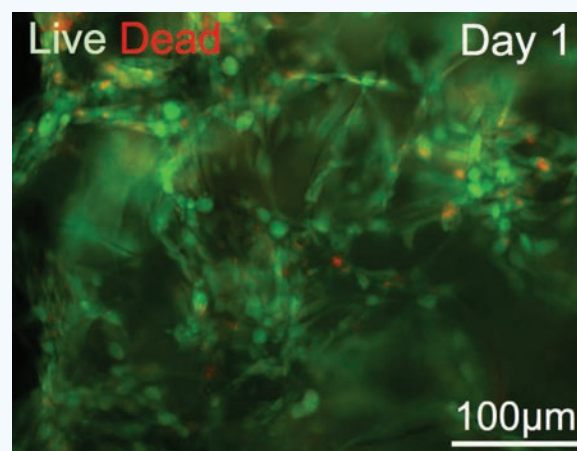

**Supplementary Figure 4** Fluorescent image of live-dead staining after 24 hours perfusion culture of human BMSCs in a microfluidic hydrogel scaffold (Green: live, Red: dead). Fluorescent image based analysis indicated  $90 \pm 2\%$  cell viability ( $N = 3$ ).

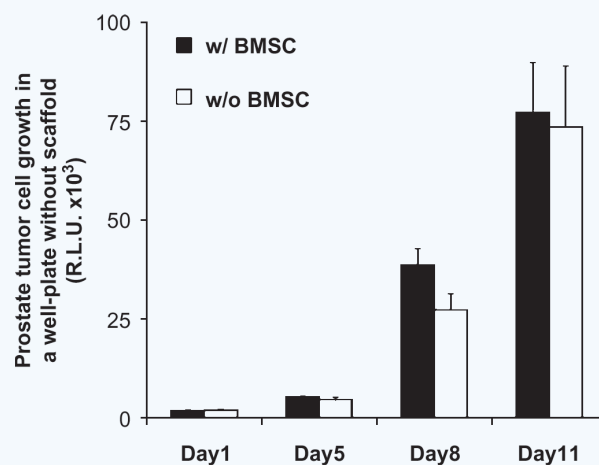

**Supplementary Figure 5** Comparison of human prostate tumor growth on 2D culture with and without human BMSCs. The result showed growth of PC3 tumor cells is independent of human BMSCs on a 2D substrate ( $n = 5$ ).
